# Supplementary material
Source: PubMed Central journal article supplement (PMC3562825)
Supplement: 1220601110_pnas.201220601SI.pdf [file 1220601110_pnas.201220601SI.pdf]

# Supporting Information

Tatituri et al. 10.1073/pnas.1220601110

## SI Materials and Methods

**Mice.** C57BL/6 mice were obtained from Jackson Laboratory. MyD88<sup>-/-</sup> mice were provided by K. Kobayashi (Harvard Medical School, Boston). All mice were housed in specific pathogen-free conditions, and female mice at 6–14 wk of age were used for experiments. All animal studies were approved by the Dana-Farber Cancer Institute Animal Care and Use Committee.

**In Vitro NKT Cell Assays and *Mtb* Infection.** The CD1d-restricted T-cell hybridomas 14S.6, TBA7, VII68, 14S.10, 431.A11, 14S.15, XV19, and VIII24 (dNKT cell) and 24.9 (iNKT cell) were described (1–3) and maintained in complete RPMI medium [RPMI supplemented with 10% (vol/vol) FBS (Gemini), Hepes, L-glutamine, penicillin/streptomycin, and 2-mercaptoethanol (Invitrogen)]. RAW.267 cells transfected with mouse CD1d were maintained in complete DMEM and used in coculture experiments. Murine iNKT cell lines and BMDCs were generated as described (4). Hybridomas or iNKT cell lines ( $1 \times 10^5$  to  $2 \times 10^5$  per well) were cultured with RAW cells or BMDCs ( $10^4$  to  $10^5$  per well) in 96-well plates (Costar; Corning) in complete RPMI. Microbial lipids or stimuli were added, and cultures were incubated for 16–48 h at 37 °C. For infection experiments, *Mtb* H37Rv was prepared and added to RAW cells at various multiplicities of infection (MOIs) as described (5). Hybridoma lines were added to the infected RAW cells immediately following infection with *Mtb* and cocultured for 24 h. MOI was determined by taking a ratio of bacterial burden, based on CFU measurements, to macrophage number. Culture supernatants were analyzed by ELISA with matched antibody pairs for IL-2 or IFN- $\gamma$  (BD Pharmingen). For fix→pulse/pulse→fix experiments, RAW.CD1d cells were fixed with 0.04% paraformaldehyde for 10 min before or after loading with antigen and coculture assays with hybridoma cells were performed as described above.

**Determination of TCR  $\alpha$ - and  $\beta$ -Chain Sequences of NKT Hybridomas.** mRNA from hybridomas was extracted by using TRIzol (Invitrogen) and reverse-transcribed into cDNA by using a cDNA synthesis kit (Qiagen) following manufacturer's instructions. V $\alpha$ , V $\beta$ , C $\alpha$ , and C $\beta$  primers and PCR conditions have been described (6). PCR products were sequenced, and TCR- $\alpha$  and - $\beta$  gene use was analyzed by using the International ImmunoGeneTics Information System database ([www.imgt.org](http://www.imgt.org)).

**Bacteria and Isolation of Microbial Lipids.** Lyophilized  $\gamma$ -irradiated *Mtb* and *Mtb* whole-cell lysates were provided by Colorado State University (Fort Collins, CO). *Cg* was grown in LB culture medium at 37 °C until mid- to late-log phase and washed  $\times 3$  with PBS. Bacteria were lyophilized, and lipids were extracted and analyzed by TLC as described (7) or analyzed by HPLC using an AutoPurification HPLC system coupled to a mass detector with both electrospray (ES) and atmospheric pressure chemical ionization capabilities, evaporative light scattering detector, and photodiode array detector (Waters) (4). Glycolipids were visualized by spraying TLC plates with  $\alpha$ -naphthol/sulfuric acid followed by gentle charring of plates, by spraying with 5% ethanolic molybdophosphoric acid and charring, or by using a Dittmer and Lester reagent that is specific for phospholipids and glycolipids.

**Lipids.** Synthesis of 16:0/18:1 and 18:1/16:0 PG will be described elsewhere. All other lipids were from Avanti Polar Lipids.

**Generation of *pgsA*-Deficient *Cg*.** To enable the specific deletion of NCgl1889, the gene encoding for *pgsA* (Fig. S4), in the chromosome of WT *Cg* the nonreplicative plasmid pK19mobsacB $\Delta$ 1889 was constructed (8). By using primer pairs P1 (CGTTCGCGGG CTCGCGGTGGACGGTACGAAC) and P2rev (CCCATCCACTAAACTTAAACAGGTGTTCCACCCTACCTGCACCC) the 3' end of the gene was amplified, and using primer pairs P3 (TGTTTAAGTTTAGTGGATGGGTACCTGTGGGATTACGAAAGTCC) and P4rev (GCTTCCCGGGTTGCCATCGCACGGGCGCACTG) the 5' end. The resulting fragments served in a cross-over PCR with P1 and P4rev as primers as template to generate a 593-bp fragment containing 12 nt of the 3' end of NCgl1889 together with genomic upstream sequences and 36 nt of the 5' end together with genomic downstream sequences. It was cloned via its SmaI sites into pK19mobsacB, and the insert of pK19mobsacB $\Delta$ 1889 was verified by sequencing. For expression of NCgl1889 the fragment generated by the primer pairs Ex1889RBSfor (GATTATGTCGACAGGAGATATAGATGTGCAGGTAGGGTGGAAACACCG) and Ex1889rev (GATATTGAATTCCTAGCTTTCTGCGGACTTTCGTG) was cloned via Sall and EcoRI sites into pEKEx2 (9), with the insert of pEKEx2-1889 verified by sequencing. Plasmid pK19mobsacB $\Delta$ 1889 was used to transform *Cg* to kanamycin resistance, indicating chromosomal integration. Sucrose-resistant clones were selected in a second round of positive selection, indicating loss of the vector-encoded *sacB* function. The specific deletions were verified by PCR. Plasmid pEKEx2-1889 served for complementation studies. Plasmids were introduced in *Cg* by electroporation as described (10). Use of the deletion vector pK19mobsacB $\Delta$ 1889 and positive selection for integration with subsequent positive selection for loss of vector, yielded 5 mutants out of the 10 clones inspected that had lost chromosomal NCgl1889, whereas in the remaining 5 clones, the WT situation was restored. One of the representative mutants, termed *C. glutamicum* $\Delta$ *pgsA*2, was analyzed in more detail. Growth of the mutant in liquid minimal medium CGXII was only slightly reduced from 0.39 to 0.33 h<sup>-1</sup>, as was the final optical density. Transformation of *C. glutamicum* $\Delta$ *pgsA*2 with pEKEx2-1889 restored growth ( $\mu = 0.41$  h<sup>-1</sup>).

**Structural Analysis of Lipids.** MS analysis, including low-energy collisionally activated dissociation multistage MS (MSn) experiments, were conducted on a linear ion-trap mass spectrometer (Finnigan; Thermo Fisher Scientific) with Xcalibur operating system (4, 11). Lipid extracts dissolved in chloroform/methanol (1/2) were continuously infused (2  $\mu$ L/min) to the ESI source, where the skimmer was set at ground potential, the ES needle was set at 4.5 kV, and temperature of the heated capillary was 300 °C. The automatic gain control of the ion trap was set to  $2 \times 10^4$ , with a maximum injection time of 100 ms. Helium was used as the buffer and collision gas at a pressure of 10–3 mbar (0.75 mTorr). The MSn experiments were performed with an optimized relative collision energy ranging from 18% to 25%, an activation *q* value at 0.25, and the activation time at 30–50 ms to leave a minimal residual abundance of precursor ion ( $\sim 10\%$ ). Mass spectra were accumulated in the profile mode, typically for 3–10 min for MSn ( $n = 2, 3, \text{ and } 4$ ) spectra. The mass resolution of the instrument was tuned to 0.6 D at half peak height.

**CD1d Binding and Plate Assays.** Mouse biotinylated CD1d was from the National Institutes of Health tetramer facility. For loading, lipids were dried under nitrogen, sonicated in 0.05% (vol/vol) Tween-20, and incubated overnight at 37 °C with CD1d. A molar







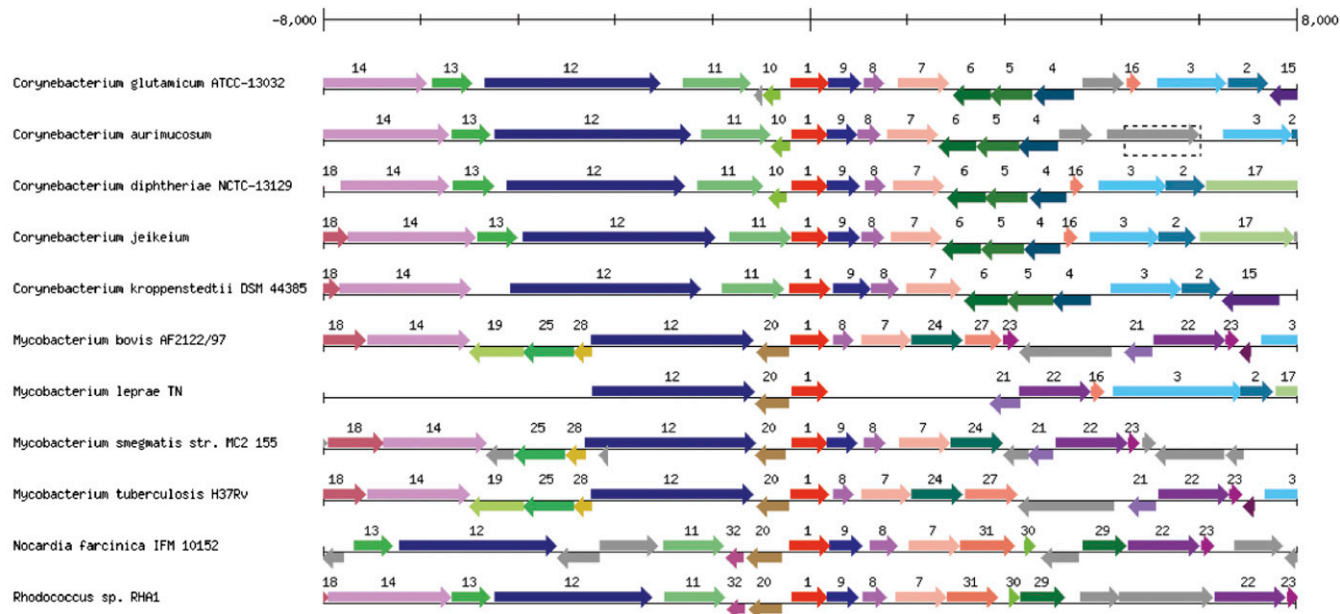

|    |                                                                    |    |                                                      |
|----|--------------------------------------------------------------------|----|------------------------------------------------------|
| 1  | CDP-diacylglycerol--glycerol-3-phosphate 3-phosphatidyltransferase | 6  | Biotin transport energy-coupling factor protein BioN |
| 2  | Regulatory protein recX                                            | 7  | Hypothetical                                         |
| 3  | RecA                                                               | 8  | Transcriptional Regulator                            |
| 4  | BioY protein                                                       | 9  | Competence-damage protein cinA                       |
| 5  | Bio M                                                              | 10 | Hypothetical                                         |
| 20 | Amino-acid acetyltransferase (EC 2.3.1.1)                          |    |                                                      |

**Fig. S4.** Generation of *pgsA*-deficient *Cg*. The gene NCg1889 encodes *pgsA* in *Cg* and is the ortholog of Rv2746c in *Corynebacteriales*. Rv2746c is present in a cluster of genes conserved in *Corynebacteriales*, indicating relevant biosynthetic functions. Even in *Mycobacterium leprae* with its decayed genome Rv2746c is retained, as is the divergently transcribed amino acid acetyltransferase gene within all mycobacterial species. Due to the essentiality of Rv2746c in *Mtb* (1), we expected the ortholog NCg1889 to be essential in *Cg*, too. However, deletion mutants could easily be obtained. Shown are the gene cluster and annotated genes in this region.

1. Sassetti CM, Boyd DH, Rubin EJ (2003) Genes required for mycobacterial growth defined by high density mutagenesis. *Mol Microbiol* 48(1):77–84.
